# Supplementary material for: Molecular Mechanism of Xixin-Ganjiang Herb Pair Treating Chronic Obstructive Pulmonary Disease-Integrated Network Pharmacology and Molecular Docking
Source: Evid Based Complement Alternat Med. 2021 Jun 10;2021:5532009. doi: 10.1155/2021/5532009 (PMC8211495; doi:10.1155/2021/5532009)
Supplement: Supplementary Materials — Table S1: differentially expressed genes in GEO chip. Table S2: top 20 KEGG pathway analysis. [file 5532009.f1.zip]

Archive with 2 entries (2 files):
- Table S1 (1).docx
- Table S2 (1).txt
