# Supplementary material for: Molecular Mechanism of Xixin-Ganjiang Herb Pair Treating Chronic Obstructive Pulmonary Disease-Integrated Network Pharmacology and Molecular Docking
Source: Evid Based Complement Alternat Med. 2021 Jun 10;2021:5532009. doi: 10.1155/2021/5532009 (PMC8211495; doi:10.1155/2021/5532009)
Supplement: Supplementary Materials — Table S1: differentially expressed genes in GEO chip. Table S2: top 20 KEGG pathway analysis. [file 5532009.f1.zip › Table S2 (1).txt]

id	logFC	AveExpr	t	P.Value	adj.P.Val	B
LPAR3	-1.653167929	5.529058917	-11.90433617	9.48E-16	2.05E-11	24.89777069
GCLC	0.805456527	7.58673402	9.69644948	9.14E-13	9.90E-09	18.59284503
HCRP1	0.829545496	5.8809464	8.849516031	1.50E-11	9.41E-08	15.99005898
SLC20A1	0.833987114	8.979940582	8.804448928	1.74E-11	9.41E-08	15.84898414
SH3RF1	0.960860622	4.824998151	8.44597404	5.82E-11	2.25E-07	14.71831034
NLN	0.653727427	6.950692477	8.426086838	6.22E-11	2.25E-07	14.65515569
SLC26A11	1.367829901	9.723908113	8.133335069	1.68E-10	5.21E-07	13.7206111
TOB1	1.024553639	8.931514724	7.99664311	2.69E-10	6.03E-07	13.28129097
ITIH5	-1.226992884	5.381042626	-7.716731378	7.03E-10	1.27E-06	12.37634729
PRKCB	0.690455058	5.358110015	7.599767983	1.05E-09	1.75E-06	11.99627697
PRKAR2B	-1.544441868	8.636788619	-7.370130436	2.33E-09	3.15E-06	11.24717578
FBXO15	1.488735257	5.969699356	7.214115671	4.00E-09	5.10E-06	10.73632568
SETDB2	0.647960503	6.236349147	7.155905466	4.90E-09	5.72E-06	10.54538151
PMEPA1	-0.69900292	6.336982052	-7.144467273	5.10E-09	5.72E-06	10.50784133
CD3D	-1.144605258	6.497145709	-7.134525097	5.28E-09	5.72E-06	10.47520592
SPECC1	0.518466353	5.375006668	7.094518052	6.07E-09	6.26E-06	10.34383472
XIAP	0.521863929	8.327493403	7.076819673	6.45E-09	6.35E-06	10.28569516
ATP6V0D2	1.770920632	9.396882104	6.996176499	8.54E-09	7.71E-06	10.02061125
ETHE1	-0.746621573	10.01063703	-6.970324774	9.35E-09	8.10E-06	9.935578566
PROCR	-1.573723965	8.737942256	-6.927645632	1.08E-08	9.03E-06	9.795143028
STOX2	0.840904201	5.175267092	6.889295364	1.24E-08	9.79E-06	9.668898867
SMIM3	1.355439119	8.220061829	6.876001234	1.30E-08	9.79E-06	9.625125409
DENND4C	0.565555217	8.67469273	6.853940678	1.40E-08	9.79E-06	9.552475147
LIMK2	-0.856368943	7.309825982	-6.809195886	1.64E-08	1.05E-05	9.405078887
ZFAND6	0.644066796	8.869628827	6.783874061	1.79E-08	1.09E-05	9.32164208
SHROOM3	-1.495747192	6.471490994	-6.780300376	1.81E-08	1.09E-05	9.309865358
PLXNC1	1.17740363	5.935709335	6.72541537	2.19E-08	1.25E-05	9.128962443
CFB	-1.123701123	6.704237455	-6.718932876	2.24E-08	1.25E-05	9.107591921
SEMA4D	-0.90546789	6.754504663	-6.699894304	2.40E-08	1.30E-05	9.044824013
TGFBR2	-0.795036344	8.865113886	-6.683239563	2.54E-08	1.34E-05	8.989910289
NEO1	-0.506662036	4.65154922	-6.654897027	2.81E-08	1.45E-05	8.896450072
PARP3	-0.529237803	7.099854487	-6.605304577	3.34E-08	1.68E-05	8.732893194
NEIL2	-0.615093103	6.314066494	-6.560963491	3.89E-08	1.89E-05	8.586635866
PDPN	0.582622347	4.677865776	6.557806709	3.94E-08	1.89E-05	8.576222839
AFAP1L1	0.986292846	5.008418088	6.53219276	4.30E-08	2.00E-05	8.49173041
ETS1	-0.542832045	4.581431505	-6.52997977	4.34E-08	2.00E-05	8.484430329
SLC22A4	-1.044922553	7.28718667	-6.493963727	4.92E-08	2.22E-05	8.365621317
SLC48A1	0.653831135	7.025249031	6.456058285	5.61E-08	2.36E-05	8.240579783
CRTAM	0.7909682	9.998284288	6.441953103	5.90E-08	2.36E-05	8.194050935
PLIN2	0.629947063	9.169510612	6.438428943	5.97E-08	2.36E-05	8.182425901
UBXN2A	0.573476165	8.3658902	6.438026419	5.98E-08	2.36E-05	8.181098114
IFT57	-0.526278763	5.834032556	-6.437019531	6.00E-08	2.36E-05	8.177776734
TCEB1	0.653047284	9.831055369	6.393181672	6.99E-08	2.58E-05	8.033176929
SLC19A3	-1.864086834	5.817569215	-6.372687588	7.51E-08	2.68E-05	7.965582318
ID2	0.840312553	9.420049123	6.32876137	8.75E-08	3.06E-05	7.820718886
FBXL2	-0.869868322	5.845566234	-6.2995089	9.69E-08	3.26E-05	7.724263041
ITGAE	0.961131671	10.78974762	6.296921126	9.78E-08	3.26E-05	7.71573091
ZFYVE16	0.578654768	6.754333734	6.287089647	1.01E-07	3.29E-05	7.68331671
RP11-403P17.4	0.871464493	8.70905651	6.285319963	1.02E-07	3.29E-05	7.677482282
RP11-271C24.3	1.221724544	6.646099384	6.269900939	1.07E-07	3.32E-05	7.626650237
SHISA4	-0.773106341	5.827833892	-6.268747259	1.08E-07	3.32E-05	7.62284708
MATR3	0.667553922	5.123330939	6.264863617	1.09E-07	3.32E-05	7.610044675
TRERF1	0.750839437	4.911747104	6.261556628	1.11E-07	3.32E-05	7.599143449
MRTO4	0.640166695	7.723040583	6.258100832	1.12E-07	3.32E-05	7.587751942
A4GALT	-0.666692811	6.315164557	-6.233714834	1.22E-07	3.52E-05	7.507374654
DMXL1	0.752051945	8.057844515	6.210221247	1.32E-07	3.72E-05	7.429952081
SNX20	-0.532593619	6.861260204	-6.209750119	1.32E-07	3.72E-05	7.428399634
ANKRD28	0.605243572	7.813788699	6.177788061	1.48E-07	4.11E-05	7.323093033
LOC100132167	-0.511935183	5.953590169	-6.172994855	1.51E-07	4.13E-05	7.307303159
TMEM14A	-0.95916618	9.01423891	-6.159348568	1.58E-07	4.27E-05	7.262353039
CXCL9	-2.599825163	6.813454801	-6.147870511	1.64E-07	4.39E-05	7.224549391
SLC38A6	0.795990809	10.89031573	6.135934048	1.71E-07	4.45E-05	7.185240433
GPNMB	0.632278807	12.03478589	6.134694692	1.72E-07	4.45E-05	7.181159274
IRF7	-0.749627392	8.803055956	-6.05918181	2.24E-07	5.57E-05	6.932601546
KANSL1	0.550671368	7.726448481	6.038894935	2.40E-07	5.91E-05	6.865863345
AKT3	-0.650274741	6.396706847	-6.030404057	2.47E-07	5.99E-05	6.837935914
CIR1	1.187865035	9.425513528	6.011498463	2.64E-07	6.28E-05	6.775764792
CDC42-IT1	0.827921617	6.018548462	5.981548715	2.93E-07	6.82E-05	6.677308757
SOAT1	0.593400142	10.51272623	5.977838184	2.97E-07	6.84E-05	6.665113853
VGLL3	-0.815515181	3.999334379	-5.971513348	3.03E-07	6.92E-05	6.644328436
CADPS2	-1.4321343	5.80756439	-5.926256319	3.55E-07	7.92E-05	6.495659522
RRN3P1	0.614471635	6.729523635	5.908658215	3.77E-07	8.27E-05	6.437879724
CYBRD1	1.234569965	5.474453422	5.907998695	3.78E-07	8.27E-05	6.43571466
BAG3	1.000895749	9.832551486	5.898441578	3.91E-07	8.47E-05	6.404343504
RRAGD	0.580898109	10.58502212	5.871626897	4.29E-07	8.95E-05	6.316353078
C12orf4	0.509024894	8.764727824	5.871264742	4.30E-07	8.95E-05	6.315164986
FAM228B	0.671634018	7.077635272	5.852854719	4.58E-07	9.44E-05	6.254779448
CD8A	-0.776899051	4.734460005	-5.845745418	4.69E-07	9.51E-05	6.231466351
ZNF646	-0.608945586	6.024190149	-5.802692621	5.45E-07	0.000105346	6.090356176
SRPX	1.68634752	4.835597204	5.763447432	6.24E-07	0.000115521	5.961836277
FLJ31306	0.659516229	6.544537138	5.757733117	6.37E-07	0.000116502	5.943132287
STARD10	-0.660313124	6.37970134	-5.752915804	6.47E-07	0.000116813	5.927366212
DNASE2B	1.596030999	9.449383161	5.736473042	6.85E-07	0.000120264	5.873565483
PSMC6	0.513426033	10.43594164	5.735022816	6.89E-07	0.000120264	5.868821323
CORO7	-0.539117351	6.801383394	-5.704826608	7.64E-07	0.000129328	5.770076679
ZMYND15	-0.997045076	7.205173177	-5.688132664	8.10E-07	0.000134245	5.715516813
GYPC	-0.872329403	10.26837748	-5.687325229	8.12E-07	0.000134245	5.712878492
SMAD7	-0.85076836	8.371238888	-5.64879295	9.28E-07	0.000150982	5.587036141
MINOS1P1	1.12029867	6.355619527	5.643341742	9.45E-07	0.000150982	5.569243272
BCL11A	1.043757119	6.499061828	5.641762079	9.51E-07	0.000150982	5.564087699
CYP1B1	1.357311238	10.21068889	5.637354762	9.65E-07	0.000151436	5.549704613
ARHGAP24	-0.744644826	6.255425043	-5.627030965	1.00E-06	0.000153231	5.516020045
LGALS3BP	-0.85741172	11.21334496	-5.622081603	1.02E-06	0.000153231	5.499874584
PPAP2A	-0.672742684	7.802008541	-5.619599938	1.03E-06	0.000153231	5.491779894
KRT10	0.766557853	8.769047455	5.586107225	1.15E-06	0.000167093	5.382588371
SKAP1	-0.688658466	5.306140854	-5.572287342	1.21E-06	0.000173211	5.337563836
C2	-0.812493719	7.661861233	-5.562465846	1.25E-06	0.000175681	5.305576944
RASSF5	-0.824787961	9.033492009	-5.551278085	1.30E-06	0.000180242	5.269151761
NAA25	0.622911465	6.209808645	5.549087222	1.31E-06	0.00018045	5.262020172
MAN1B1-AS1	0.505102381	7.377466195	5.540111566	1.35E-06	0.000183772	5.232808003
RAP2B	0.522341635	7.289144434	5.532399819	1.39E-06	0.000187536	5.20771576
ZDHHC2	-0.538915855	6.872305622	-5.521154418	1.44E-06	0.000190805	5.17113656
SLC6A16	0.714869105	4.786090166	5.519938377	1.45E-06	0.000190805	5.167181774
SLC39A10	1.461842461	6.575862395	5.510690765	1.49E-06	0.00019397	5.137111822
PAPD4	0.598740699	7.261066235	5.510150376	1.50E-06	0.00019397	5.135354944
ACVRL1	-0.734595194	7.470256733	-5.49454957	1.58E-06	0.000202238	5.084647618
RASAL3	-0.574299026	7.145980697	-5.489887038	1.60E-06	0.000203322	5.069497935
HOXB6	-0.519007944	5.703159127	-5.487876178	1.62E-06	0.000203322	5.062964879
LAMB1	-1.696442863	5.328343958	-5.485811448	1.63E-06	0.000203587	5.056257254
MOSPD1	0.619636031	9.098420992	5.483307196	1.64E-06	0.000203602	5.048122377
SLC8A1	-0.51825943	5.891148336	-5.482444899	1.65E-06	0.000203602	5.045321423
VNN1	1.41491181	7.592253379	5.479159382	1.66E-06	0.000204744	5.034649981
TNS1	1.019376443	6.724853157	5.464905793	1.75E-06	0.000210242	4.98836744
TRBC1	-1.337994936	5.765659559	-5.452054436	1.83E-06	0.000216127	4.946657049
TMEM192	0.639029339	8.399543354	5.441271875	1.90E-06	0.000223059	4.911675245
AL833181	1.133027945	5.81244738	5.416329794	2.06E-06	0.000239914	4.830806014
EMR1	-1.743197207	8.396723087	-5.406749754	2.13E-06	0.000245762	4.799763801
EDEM2	-0.562490681	9.737776928	-5.382375678	2.32E-06	0.000257584	4.720832965
CYB5R3	-0.685159087	10.86850584	-5.376476424	2.37E-06	0.000261502	4.70173997
MLF1	-0.681861056	6.465211413	-5.370839323	2.41E-06	0.000265247	4.683499356
IFI27	-1.768656299	10.50684823	-5.355199455	2.55E-06	0.000277025	4.632911893
CAMP	-0.930617749	7.551746376	-5.348192661	2.61E-06	0.000280926	4.610258037
SLC43A2	-0.837433318	8.240803139	-5.340421213	2.68E-06	0.000287068	4.585139095
ZNF573	0.506063554	5.104249647	5.337220081	2.71E-06	0.000288799	4.574794566
IL32	-1.601280051	5.781757746	-5.329628361	2.78E-06	0.000294944	4.550266913
DSERG1	0.671574849	4.831854164	5.315188644	2.92E-06	0.00030538	4.503634672
KL	-1.036110092	4.494251792	-5.298449477	3.09E-06	0.000318738	4.449610096
SCGB1A1	-0.787109717	5.203986831	-5.29613259	3.12E-06	0.000319749	4.442135372
TRANK1	-0.520214061	6.865749878	-5.286655109	3.22E-06	0.00032871	4.411566537
CST6	0.630171296	4.850050916	5.282173651	3.27E-06	0.000332212	4.3971161
RASGRP3	0.640459323	6.009479638	5.278933358	3.30E-06	0.000332282	4.386669459
DBF4	0.691190399	7.596095677	5.269885534	3.41E-06	0.000340057	4.35750689
ANKRD10-IT1	0.638687441	7.363297175	5.254934375	3.59E-06	0.000349279	4.309341177
PDE4B	-1.219919757	6.529211316	-5.253334351	3.61E-06	0.000349279	4.304188442
FABP5	0.627557008	12.70106847	5.251664826	3.63E-06	0.000349279	4.298812264
PDCD1LG2	-0.972963328	7.683016014	-5.249329893	3.66E-06	0.000350233	4.291293987
ADORA3	1.337700132	5.589392842	5.236145952	3.82E-06	0.000361805	4.248857003
MMP2	0.524159314	4.987443345	5.23130187	3.89E-06	0.00036366	4.233270757
MLLT11	1.448370433	6.906455391	5.225589371	3.96E-06	0.000368343	4.214894528
HS3ST2	2.083659363	6.859230513	5.220376617	4.03E-06	0.000371752	4.198129912
AHRR	1.304434582	7.03599138	5.207392917	4.22E-06	0.000377579	4.156390114
FHL1	-0.827897031	8.252911941	-5.206726714	4.23E-06	0.000377579	4.154249064
PRR11	0.688767391	8.412280834	5.204562027	4.26E-06	0.000377579	4.147292609
MPV17L	0.637957634	6.453321934	5.202374256	4.29E-06	0.000377579	4.140262659
PLEKHA4	-0.514393624	5.464568479	-5.197646627	4.36E-06	0.000380609	4.125073758
FAIM	0.694468679	10.51832108	5.180233984	4.63E-06	0.000394298	4.069158528
ASAP1-IT1	0.947306211	7.218084158	5.147115709	5.18E-06	0.000430921	3.962933385
LOC100190986	1.204039255	7.218211574	5.135407191	5.39E-06	0.000445149	3.925418514
PTK2B	-0.51150562	7.117690982	-5.131725067	5.45E-06	0.000447333	3.913625083
CCL5	-1.300744123	6.491358036	-5.125629751	5.57E-06	0.000453249	3.894107062
GBP4	-1.055950938	6.566927649	-5.11314023	5.81E-06	0.00046586	3.854131955
CD69	-1.349867245	4.349028854	-5.107442654	5.92E-06	0.000473196	3.835903874
SGTB	0.728903026	7.026441674	5.105507115	5.96E-06	0.00047456	3.829712723
AK090844	0.665017452	6.220688255	5.099737326	6.08E-06	0.000480401	3.811260592
CHD9	0.52429524	6.924242866	5.088397867	6.32E-06	0.000493381	3.77501173
SECTM1	-1.013343933	8.271524152	-5.074586248	6.62E-06	0.000507565	3.730887975
RNF19A	-0.626381678	8.076536334	-5.073959729	6.63E-06	0.000507565	3.728887176
TAF15	0.528862881	6.197578934	5.072559078	6.66E-06	0.000508182	3.724414405
MDFIC	0.508865474	8.522207774	5.067947005	6.77E-06	0.000514367	3.709688684
SRI	-0.609646002	9.438431446	-5.0608997	6.93E-06	0.000521295	3.687194315
SPINT2	-0.589059032	8.682281273	-5.050308054	7.19E-06	0.000534741	3.653402084
TMEM74B	-0.770245357	6.484585302	-5.043352602	7.36E-06	0.000541881	3.631221096
LIMA1	-0.812811434	7.758870015	-5.030717463	7.68E-06	0.000559812	3.590948225
FABP3	1.505991014	8.641369492	5.029696703	7.70E-06	0.000559861	3.587695856
CCDC91	0.594062564	6.843783785	5.028308363	7.74E-06	0.000560612	3.583272579
HTRA4	1.206236706	8.935392216	5.019110643	7.99E-06	0.000570669	3.553976712
RAB24	-0.535151759	8.117526446	-5.013873145	8.13E-06	0.000575156	3.537301071
IL10RA	-0.634161924	10.92863745	-5.008668259	8.27E-06	0.00058254	3.520733916
FAM198B	1.199101042	7.644825884	5.006966094	8.32E-06	0.00058254	3.515316933
TMEM173	-0.880945167	7.393389002	-5.006705264	8.33E-06	0.00058254	3.514486912
AK025288	0.588398734	4.353456066	5.005293139	8.37E-06	0.00058254	3.509993396
DFNA5	1.266835449	10.47943894	5.003679211	8.41E-06	0.000583844	3.504858146
ERV3-2	0.952544668	4.80710359	5.000039774	8.52E-06	0.00058917	3.493279714
PDE1B	-0.527837552	6.382101956	-4.995888717	8.64E-06	0.000593223	3.480076429
RSPO3	-2.067383336	5.837094731	-4.993373799	8.71E-06	0.000594967	3.472078671
CYP11B2	-0.504067003	6.18895778	-4.991503891	8.77E-06	0.000596848	3.466132843
OLR1	-0.824615649	11.74504041	-4.987000233	8.90E-06	0.000602195	3.451814872
TCF15	-0.64755807	5.987160172	-4.98350388	9.00E-06	0.000607438	3.440701757
DERA	0.504113977	9.658270782	4.980747883	9.09E-06	0.000611204	3.431943371
CNIH3	0.813551946	4.977933177	4.978475742	9.16E-06	0.000613996	3.424723652
IFNGR1	0.533559439	9.958289853	4.970708024	9.40E-06	0.000626403	3.400048654
TRAC	-0.801979499	6.123531902	-4.969007923	9.46E-06	0.000628069	3.394649526
SELPLG	-0.536615112	8.391759415	-4.948063431	1.01E-05	0.000665538	3.328177056
FLOT2	-0.798347031	8.253814392	-4.946382915	1.02E-05	0.000665538	3.322846953
WDR54	-0.51342034	5.978174603	-4.944249893	1.03E-05	0.00066832	3.316082365
GAS2L3	0.838448603	8.908521686	4.939043271	1.05E-05	0.000678094	3.299573754
LOC286437	0.531450782	6.045805789	4.935538452	1.06E-05	0.000684088	3.28846382
S100B	0.537527732	3.70214748	4.924121376	1.10E-05	0.000702842	3.252288425
TPD52	-0.643483187	6.489289015	-4.91959661	1.12E-05	0.000704921	3.237958193
PSMB7	0.536585732	8.918248309	4.918661166	1.12E-05	0.000705085	3.234996055
ACER3	0.566193419	8.332266445	4.916211202	1.13E-05	0.000708854	3.227238866
TREM1	-0.603665666	11.68448106	-4.896425803	1.21E-05	0.000738298	3.164634489
ZZZ3	0.542595203	7.714561011	4.879778617	1.28E-05	0.000767699	3.112017171
PSMB8	-0.607843465	10.30733788	-4.874477169	1.30E-05	0.000777152	3.095271809
PNRC1	-0.742082761	10.7986685	-4.872788835	1.31E-05	0.000779411	3.089940106
LCP1	-0.506630024	12.38120536	-4.871693025	1.31E-05	0.000779425	3.086479864
IDH1	0.628411903	9.648253699	4.870758831	1.32E-05	0.000779425	3.083530143
PTMS	-0.502071477	6.256712369	-4.867741209	1.33E-05	0.000781941	3.074003135
CYTL1	1.064731902	4.578574875	4.865712088	1.34E-05	0.000784094	3.067597939
HLA-DQB2	-1.894526975	8.546487276	-4.864508119	1.34E-05	0.000784094	3.063797824
LOC100129406	0.922213389	5.28997765	4.848491416	1.42E-05	0.000814367	3.013270755
C8B	-1.181335937	7.878689063	-4.846267751	1.43E-05	0.000817424	3.006259839
RCAN2	-1.787062665	5.859218489	-4.845700438	1.43E-05	0.000817424	3.004471331
FOLR3	-1.307087505	7.266290026	-4.844574731	1.44E-05	0.000818351	3.000922627
GRIPAP1	-0.549699303	7.598774766	-4.832326964	1.50E-05	0.000841518	2.962328628
OSM	-0.672561428	5.492129161	-4.817858894	1.57E-05	0.00086968	2.91677666
DDIT4L	1.044666272	5.759951454	4.816359055	1.58E-05	0.000871306	2.912056894
FAM63B	0.531182191	6.502890185	4.812286054	1.60E-05	0.000877058	2.899242059
COL15A1	1.041392713	4.787529695	4.808261589	1.62E-05	0.000884453	2.886583225
AOX1	-0.62576968	5.06600985	-4.805427119	1.64E-05	0.000889974	2.877669453
KIAA1147	-0.618764979	7.448455966	-4.804356882	1.64E-05	0.000889974	2.874304221
LOC100996412	1.306007069	9.02645516	4.801891756	1.66E-05	0.000892237	2.866553811
NPL	0.565483063	8.926680241	4.797127693	1.68E-05	0.000904295	2.851579006
IL1B	-1.474646154	11.4451012	-4.785140895	1.75E-05	0.000931959	2.813921633
MCOLN2	-1.137060385	7.189998902	-4.784238092	1.76E-05	0.000932479	2.81108661
PRPF3	-0.595847403	8.1225656	-4.771582051	1.83E-05	0.000960181	2.771361287
PLD2	-0.5152995	7.97044815	-4.765402996	1.87E-05	0.000971496	2.751978305
LPAR6	0.51632834	6.184680862	4.762853217	1.89E-05	0.000972788	2.743982269
CASC14	-0.526332426	4.775014682	-4.75859059	1.91E-05	0.000980298	2.730617838
CCDC151	-0.587341147	6.295331935	-4.758408814	1.91E-05	0.000980298	2.730048009
C20orf194	0.665712853	8.931274277	4.745030712	2.00E-05	0.001008275	2.688129616
TSPAN6	-0.619849226	5.001911161	-4.734777493	2.07E-05	0.001031281	2.656028332
TIMP1	-0.731988693	11.63999882	-4.732178408	2.09E-05	0.001031993	2.647894558
N4BP2L2	0.535316811	7.270975862	4.728326968	2.12E-05	0.001039312	2.635844235
LINC01010	1.242206402	7.128368215	4.720879076	2.17E-05	0.001053427	2.612550461
ALDH18A1	-0.734590964	7.082954555	-4.715544018	2.21E-05	0.001067486	2.595872091
IFI35	-0.690864925	8.910403044	-4.711459282	2.24E-05	0.001074875	2.583106636
ABCC5	0.531164988	6.508165229	4.702827038	2.30E-05	0.001093459	2.556141461
ZNF426	0.609490391	5.949535123	4.691325237	2.39E-05	0.001126704	2.520237857
TRPM4	-0.577853541	6.170563084	-4.688037948	2.42E-05	0.001134129	2.509981742
TJP1	-0.958744952	6.34903229	-4.680623427	2.48E-05	0.001149921	2.486857754
IFITM3	-1.219935055	9.48310544	-4.674590559	2.53E-05	0.001160725	2.468051827
LOC101928716	0.811277739	8.59592527	4.673398904	2.54E-05	0.001161489	2.464338108
KIAA0930	0.660567672	10.37047995	4.668960125	2.58E-05	0.001170193	2.450507736
OAS2	-0.586037963	7.418448453	-4.662267452	2.64E-05	0.001191433	2.429663049
LOC285812	0.837683564	7.18652198	4.65822964	2.67E-05	0.001200785	2.417091959
LOC101926963	0.803991479	6.827983403	4.65376392	2.71E-05	0.001207183	2.403192948
FAM101B	1.227623256	6.694691064	4.652256743	2.72E-05	0.001207183	2.398503066
CHMP4C	-0.840723156	6.037683149	-4.652123056	2.73E-05	0.001207183	2.398087095
ZC3H12C	0.709017759	5.66377907	4.652061404	2.73E-05	0.001207183	2.397895265
A2M	0.728835822	7.325213471	4.649535012	2.75E-05	0.001214836	2.390035167
CLIC4	-0.526099105	10.25419024	-4.6468109	2.77E-05	0.001218378	2.381561548
DRAP1	-0.595418651	8.528898358	-4.643135452	2.81E-05	0.001228302	2.370131397
CD163L1	0.586695983	6.641455236	4.637168995	2.86E-05	0.001247742	2.351583105
BTG2	-0.551873119	8.666994388	-4.636087846	2.87E-05	0.001249697	2.348222947
TUT1	-0.699791881	6.982162306	-4.631188335	2.92E-05	0.001265026	2.332998878
LGALS3	0.70543244	9.768762089	4.628056346	2.95E-05	0.001275639	2.323269872
LRRC69	0.679048622	5.510995165	4.626041809	2.97E-05	0.001280058	2.317013246
LRG1	-0.617895925	5.853028656	-4.625330537	2.98E-05	0.001280058	2.314804444
TMEM163	1.252135661	8.198516966	4.620590777	3.03E-05	0.001297142	2.300088484
HCP5	-0.98747996	6.993890065	-4.60724072	3.16E-05	0.001337071	2.258667525
IL2RB	-0.889008813	6.061937248	-4.603789837	3.20E-05	0.001347123	2.247967337
ITGAL	-0.646040598	9.029409102	-4.591117713	3.33E-05	0.001388743	2.208698865
SLC26A6	0.647868877	5.887231153	4.584165884	3.41E-05	0.001417515	2.187172681
MERTK	0.821259876	5.206295115	4.582085726	3.43E-05	0.001421297	2.18073376
SARAF	0.504584628	12.05569052	4.581692778	3.44E-05	0.001421297	2.179517545
CCDC115	-0.551357937	10.18141727	-4.574248403	3.52E-05	0.001444804	2.156483416
ACIN1	-0.555844289	7.151982365	-4.56101256	3.68E-05	0.001492964	2.115562489
CFD	-0.880841104	10.05483751	-4.546182873	3.87E-05	0.001536537	2.069764453
ACP5	0.652056797	12.50261027	4.54538794	3.88E-05	0.001537146	2.067311006
ENPP5	-0.644096758	3.757275939	-4.53238906	4.04E-05	0.001587513	2.027213879
MAP4K4	0.617116171	6.603771552	4.531821641	4.05E-05	0.001587513	2.025464532
CD2	-1.170754385	5.583157044	-4.531697776	4.05E-05	0.001587513	2.02508267
TMTC2	-0.54533306	5.639832091	-4.527595507	4.11E-05	0.001597487	2.012437934
PKIA	-0.760893168	5.621654978	-4.526476956	4.12E-05	0.001597628	2.008990865
GTF2H3	0.716211234	8.520745213	4.521457573	4.19E-05	0.00161865	1.993526325
ICAM1	-1.202310799	9.191177672	-4.520918205	4.20E-05	0.00161865	1.991864925
IFITM1	-0.910058495	5.02164825	-4.519122732	4.23E-05	0.00161865	1.986334901
EPSTI1	-1.002864747	7.840221724	-4.510924223	4.34E-05	0.001645938	1.961093906
GCLM	0.827209847	7.856555316	4.50744079	4.39E-05	0.001653264	1.950374461
ITPK1-AS1	0.536344446	4.740866383	4.489252377	4.66E-05	0.001724785	1.894453707
STAP1	-0.844961542	4.200277015	-4.483347934	4.75E-05	0.001743546	1.876318426
DAB2	0.561986644	8.727176301	4.481490357	4.78E-05	0.00175121	1.870614789
FCN1	1.284276402	6.898939481	4.461197804	5.11E-05	0.001819037	1.808364924
THAP10	-0.716561308	7.707265717	-4.455538713	5.20E-05	0.00183433	1.791023992
HEATR3	0.522314484	6.749190116	4.454990726	5.21E-05	0.00183433	1.789345259
PLA2G4A	-0.87989343	8.534299618	-4.444580024	5.39E-05	0.001873212	1.757467476
PRIM1	0.507225799	7.326451716	4.441890638	5.44E-05	0.001881705	1.749237139
PRKCZ	-0.737344386	5.109217614	-4.441161828	5.45E-05	0.001882786	1.747007088
WFS1	-0.547412442	6.858408652	-4.43863386	5.50E-05	0.001885945	1.739272958
EPHB2	0.519866285	6.126659276	4.438589991	5.50E-05	0.001885945	1.73913876
LOC101927974	0.503760242	6.176479463	4.431501085	5.63E-05	0.001913303	1.717459864
GUCY1B3	-0.519903658	4.32785261	-4.428644628	5.68E-05	0.001922147	1.708728168
NIPSNAP3A	0.799682575	9.178349578	4.428589552	5.68E-05	0.001922147	1.708559829
STAT6	-0.614724068	8.88239464	-4.418660205	5.87E-05	0.00196388	1.678224545
GFOD1	0.525094475	5.799580022	4.411343767	6.01E-05	0.002001953	1.655888839
SCT	-0.567408223	4.547714942	-4.39703958	6.30E-05	0.002071839	1.612262423
KNSTRN	0.500919931	7.895938075	4.391019595	6.42E-05	0.002100026	1.593918587
CPE	-0.734185382	8.752493557	-4.378409488	6.69E-05	0.00213308	1.555525609
ACADVL	-0.523177229	11.16899148	-4.374460426	6.77E-05	0.002143794	1.543511167
SOCS3	-0.687286552	5.865590422	-4.368166819	6.91E-05	0.002163774	1.524372658
COL23A1	0.582222648	5.421404526	4.348457185	7.37E-05	0.002264043	1.464507688
MAP1LC3A	-0.587776136	6.485513526	-4.338504106	7.61E-05	0.002316021	1.434317923
OPLAH	-0.607497341	6.643358711	-4.328899683	7.85E-05	0.002351986	1.405212123
SPRY2	1.204806463	7.30450133	4.325475464	7.94E-05	0.002363918	1.394841475
AK056982	0.841459911	8.056813537	4.322804569	8.01E-05	0.002372226	1.386754664
TRPC6	-1.046873687	5.002354344	-4.319926324	8.08E-05	0.002384954	1.378042319
C15orf61	0.511814106	8.207961254	4.318970142	8.11E-05	0.002389082	1.375148512
SET	0.511785771	10.99200231	4.314350264	8.23E-05	0.002411896	1.361170495
GCH1	-1.464290289	10.14544548	-4.305635624	8.47E-05	0.002445762	1.334819873
LCK	-0.694654604	5.207643224	-4.304680534	8.49E-05	0.002445762	1.331933274
AOC3	-1.697669387	8.212419937	-4.304634704	8.49E-05	0.002445762	1.331794767
MCOLN3	0.777252328	5.950312171	4.301319076	8.59E-05	0.002452824	1.321775917
CCR5	0.896693974	9.534576498	4.297197633	8.70E-05	0.002469068	1.30932654
MORF4L2	0.515262126	6.972752461	4.291282793	8.87E-05	0.002500251	1.291468542
LINC00597	0.543573871	4.303876788	4.288885096	8.94E-05	0.002510558	1.284232334
XK	-0.76741303	4.877436677	-4.28879826	8.94E-05	0.002510558	1.283970297
RAB42	0.707418568	9.258704966	4.282470348	9.12E-05	0.002552368	1.264880947
MAP1LC3C	-0.533213822	6.230868209	-4.277834823	9.26E-05	0.002584103	1.250904407
LINC00969	0.596065041	6.393677381	4.272984338	9.41E-05	0.002592791	1.236286462
DEFB1	-1.465152326	7.198492277	-4.272817682	9.41E-05	0.002592791	1.235784333
TRHDE	-1.27338473	6.810635617	-4.268204521	9.55E-05	0.002624181	1.221888233
GBP2	-0.92693657	9.101806879	-4.264862552	9.66E-05	0.002634043	1.211825218
PHACTR1	0.627442615	8.405400645	4.260057474	9.81E-05	0.002666429	1.197362397
PARP9	-0.533542696	8.029876625	-4.258137027	9.87E-05	0.002669639	1.191583942
ITGAM	0.718926004	10.00104453	4.254179006	9.99E-05	0.002691173	1.179678054
ALDH1A2	-0.722178516	6.47731971	-4.247031058	0.000102254	0.00272685	1.158188504
JSRP1	-0.630807306	5.681517987	-4.240203266	0.000104521	0.002770266	1.137675676
PKDCC	-0.551773978	5.59698565	-4.231991791	0.000107314	0.002830414	1.113024295
RNF144B	-0.77910764	8.847538613	-4.230950188	0.000107673	0.00283299	1.109898782
CEPT1	0.507615802	6.901597008	4.224919764	0.000109777	0.002870894	1.091809849
BCAT1	0.70006023	9.862604423	4.22327401	0.000110357	0.002879134	1.08687513
CCDC102B	0.886125389	5.196665353	4.216204517	0.000112887	0.002920382	1.065686888
TNIP3	-1.567107445	7.200592848	-4.215681991	0.000113077	0.002920382	1.064121406
PMAIP1	1.043426258	6.341204984	4.212701753	0.000114162	0.002939426	1.055194236
RGL1	0.93665175	7.953318816	4.208292652	0.000115786	0.002967127	1.041991925
CREB5	0.514522044	5.753172065	4.205050074	0.000116994	0.002992887	1.03228635
PROS1	-0.643019286	8.702082851	-4.195318395	0.000120696	0.003043728	1.003177125
HCK	-0.603984391	11.86685151	-4.193683043	0.000121329	0.003054905	0.99828834
IGF1	-0.529166154	4.6434004	-4.19259889	0.00012175	0.003054905	0.995047783
TAGLN2	-0.700091008	11.28047987	-4.187491645	0.000123755	0.00308848	0.97978699
PSMB8-AS1	-0.502857311	6.022862289	-4.182048322	0.000125927	0.003112819	0.963530836
GAS7	0.794607375	7.081237925	4.180033124	0.000126741	0.003125792	0.957514896
C16orf54	1.048185618	7.462663892	4.176975824	0.000127985	0.003145723	0.948390386
IFITM2	-0.990943092	8.68003265	-4.157229113	0.00013631	0.003268949	0.889526508
PSMB9	-0.744679953	10.37734575	-4.147642591	0.000140539	0.003351583	0.860993699
RP11-305E6.4	0.558448076	4.96813075	4.144660221	0.000141881	0.003372433	0.852123046
AICDA	0.725407388	5.962331125	4.141263444	0.000143424	0.003394209	0.842023229
ACKR3	-0.668393227	5.254800267	-4.138801437	0.000144553	0.003412523	0.834705101
RASSF2	1.233824623	6.947228942	4.137174014	0.000145303	0.003423719	0.829868766
MIR3916	0.545712379	4.448087829	4.133881676	0.000146834	0.003448523	0.820087257
SIRPA	-0.642236502	9.625306622	-4.13136774	0.000148013	0.00347245	0.812620696
SERPING1	-0.877773424	11.47868323	-4.126325133	0.000150406	0.003505216	0.797649896
LOC285181	0.717913815	7.220706485	4.12570128	0.000150705	0.003505216	0.795798327
IRG1	-1.139588161	5.147194748	-4.123435985	0.000151794	0.003526764	0.789076081
ZBED3	0.673566839	7.092390957	4.121681571	0.000152643	0.003538893	0.783870999
GZMH	-0.716863011	4.886798637	-4.12113878	0.000152906	0.003541212	0.782260819
EPB41L3	-0.566457524	10.5310482	-4.116508084	0.000155173	0.003572028	0.768527798
ORC6	0.544479857	6.914494709	4.107844462	0.000159501	0.003646162	0.742853082
C1S	-1.579542307	6.938142584	-4.106884897	0.000159988	0.003646162	0.740010895
ACSM5	0.501625281	4.991411246	4.104837188	0.000161031	0.003662782	0.733946668
RP11-38P22.2	0.653699702	8.428992136	4.101225204	0.000162887	0.003695297	0.723253206
GOLGA4	0.511629433	8.226571718	4.101060246	0.000162973	0.003695297	0.722764942
ACSS3	-0.516929435	4.49676575	-4.089190217	0.000169223	0.003785494	0.687653639
PDLIM7	-0.516011705	6.447047629	-4.088827142	0.000169418	0.003785941	0.686580395
KCNJ5	0.563355006	6.087174788	4.087461399	0.000170153	0.003794528	0.682543668
TRAPPC10	0.507988957	6.753907119	4.085888993	0.000171002	0.003801733	0.677896862
WWTR1	0.605905959	7.37777247	4.082358419	0.000172926	0.003821045	0.667466189
PPP1R14C	0.862340535	6.154533582	4.081079231	0.000173627	0.003832547	0.663687985
VASP	-0.517538021	10.45542952	-4.079035645	0.000174755	0.003845665	0.657653175
TMEM9	-0.695001891	7.36181206	-4.076514922	0.000176155	0.003856877	0.650211246
LOC644090	-0.965803827	6.548512795	-4.073132314	0.00017805	0.003882682	0.640228066
AX748339	0.602945096	5.333552084	4.069956842	0.000179848	0.003902237	0.630859645
TMEM158	0.895180946	6.987442644	4.062106281	0.000184369	0.003946487	0.60771289
REV3L	0.500874677	6.665860834	4.060650624	0.000185219	0.003958744	0.603423249
TMEM45B	0.772531069	5.283914318	4.060203532	0.000185481	0.003958744	0.602105863
RP5-894A10.6	-0.561374452	6.252253222	-4.059755937	0.000185743	0.003958744	0.600787064
BTN3A2	-0.61544154	8.543203525	-4.054477117	0.000188867	0.004005223	0.585238514
FAM223B	-0.505080724	5.677460293	-4.053578675	0.000189404	0.004005223	0.582593113
GTF2H2B	0.672063094	6.049696719	4.05028603	0.000191383	0.004028189	0.572900453
LINC00520	0.642552335	8.713116522	4.048727979	0.000192327	0.004043349	0.568315233
LOC100131541	0.947596541	7.023246003	4.047587129	0.000193021	0.004046152	0.564958317
IGSF6	0.754835428	9.511805395	4.046567431	0.000193643	0.004051352	0.561958258
GPR183	1.037012252	7.390609398	4.045873436	0.000194068	0.004054098	0.559916647
RAD51AP1	0.803098455	7.429664647	4.045741033	0.000194149	0.004054098	0.559527163
RTN1	-0.777532131	9.57735088	-4.034585508	0.000201102	0.00416316	0.526732307
C15orf37	0.677391252	7.35974584	4.030667778	0.000203601	0.004206844	0.515224964
FPR2	-1.351791278	7.130548911	-4.0282902	0.000205132	0.004218353	0.508243959
ANKRD29	0.776050611	6.101537033	4.023506903	0.000208246	0.004262886	0.494205122
PTGR1	0.511527871	8.930814532	4.021480231	0.000209579	0.004265253	0.488259239
C1R	-0.696342696	5.780174668	-4.016191825	0.000213097	0.004309915	0.472750604
EIF4E3	0.581564513	5.84648802	4.013848421	0.000214674	0.004317362	0.465881448
APOL1	-0.639292559	7.742216671	-3.999609752	0.000224503	0.004447748	0.424184399
TNFSF10	-1.131889323	5.199421351	-3.989088841	0.000232044	0.004546815	0.393419343
LMO4	-0.513773194	6.438865453	-3.988829081	0.000232233	0.004546815	0.392660242
TGFBR1	0.6376845	8.266461903	3.988515953	0.000232462	0.004547175	0.391745213
VIPR1	0.517862867	6.295700756	3.984917029	0.000235102	0.004578138	0.381230797
SH3RF3	0.788817479	4.863329978	3.981973189	0.000237283	0.004599926	0.37263358
RBP7	0.723739752	6.945817147	3.979731517	0.000238957	0.004605359	0.366088998
KCNA3	-1.162019184	6.25246742	-3.975730228	0.000241973	0.004641132	0.354411545
LOC101927451	0.531851882	5.673615008	3.97378731	0.000243451	0.004652854	0.3487433
TDRD9	1.222140409	6.023898285	3.969258952	0.000246929	0.004694477	0.335537441
ASAP1-IT2	0.740460187	6.451272862	3.961991566	0.000252613	0.004781537	0.314358872
C1RL	-0.577438379	7.246368955	-3.961442737	0.000253047	0.004784139	0.312760229
LOC101927098	0.550059559	4.961222303	3.960139602	0.000254081	0.004796754	0.308964852
RGS1	0.539483579	6.547816214	3.942114163	0.000268812	0.004983598	0.256527238
PRO2852	0.818553244	7.283856185	3.935250458	0.000274636	0.005048354	0.236590375
CYGB	0.607321317	7.398931856	3.914051336	0.000293403	0.005285645	0.175119999
C6orf62	0.554476166	8.644505489	3.913694313	0.000293729	0.005287128	0.174086133
CPED1	-0.800859032	8.678157275	-3.912454046	0.000294866	0.005294386	0.17049493
LOC100272216	0.648261319	6.998822067	3.910896923	0.000296299	0.00530853	0.165987054
CD38	-1.163702626	6.564589643	-3.906501973	0.000300381	0.005363068	0.153268392
PIGW	0.655906182	7.276588518	3.901688561	0.000304913	0.005434235	0.139346751
CHAC2	0.551997156	6.253961429	3.897889667	0.000308537	0.005494298	0.128365296
MINK1	-0.540646165	8.416776813	-3.89345983	0.000312816	0.005525047	0.115566605
TEX14	1.043757713	6.921766871	3.89263361	0.00031362	0.005534738	0.113180279
STX11	-0.569179724	8.722225221	-3.889447158	0.00031674	0.00557118	0.10397936
HRASLS	-0.654533241	4.523771383	-3.885374424	0.000320773	0.005609811	0.092224693
DNAJC5B	0.682184228	8.472332713	3.884664622	0.00032148	0.005609811	0.090176694
RNASE6	1.078415604	8.635918859	3.876285012	0.000329951	0.005693035	0.066012883
GLDN	-0.780534451	8.007356371	-3.875350639	0.000330909	0.005705014	0.063320081
FTX	0.859752199	7.045689779	3.85738328	0.000349857	0.005911645	0.011602049
ZFYVE26	0.528106589	9.886730573	3.856262129	0.000351073	0.00592067	0.008378844
APOL3	-0.936472413	8.349273058	-3.852817292	0.000354836	0.00596422	-0.001521821
TMEM55A	0.620227904	4.813137855	3.851754846	0.000356005	0.005971286	-0.004574462
TRMT13	0.50812525	6.678582614	3.845218066	0.000363276	0.006060323	-0.023346797
ALK	0.658343383	5.589292707	3.844972326	0.000363552	0.006060323	-0.024052201
SERPINH1	-0.582699435	7.76998703	-3.840879284	0.000368181	0.006113954	-0.035798096
IL2RG	-0.741867968	10.93222878	-3.835161083	0.000374744	0.006169652	-0.052197227
TMEM69	0.539766813	9.376828528	3.834978941	0.000374954	0.006169652	-0.052719388
BLVRB	0.550540544	10.8013975	3.834134483	0.000375934	0.006176377	-0.055140098
MMP7	1.355621316	7.117080074	3.832221971	0.00037816	0.006198851	-0.060621478
GPR34	1.255881605	9.261300122	3.826096548	0.000385378	0.006274416	-0.078168049
EPDR1	0.811718992	8.07258382	3.813852679	0.000400205	0.006433588	-0.113198677
ELOVL7	-1.716891981	8.279806308	-3.812586795	0.000401769	0.006439608	-0.11681722
SERINC5	0.588089898	10.3349294	3.801132609	0.000416191	0.006616888	-0.14953138
KIAA0101	0.805594782	5.043375115	3.800269069	0.000417298	0.006624765	-0.151995694
PTH2R	1.20825753	5.132030003	3.794374117	0.000424933	0.006692005	-0.168810687
PDLIM1	-0.683740831	11.23547726	-3.790766567	0.000429672	0.0067519	-0.179094425
SPATA12	0.511745858	5.367043981	3.788951199	0.000432076	0.006770021	-0.184267448
DAXX	-0.501251128	8.123680424	-3.781810264	0.000441657	0.006860582	-0.20460373
AIM2	-1.028438097	7.930265733	-3.781081926	0.000442646	0.006866804	-0.206676817
PVRL2	-0.558418714	7.553735032	-3.776776611	0.000448534	0.006903248	-0.218926954
GBP5	-1.297965825	6.56116584	-3.776303331	0.000449186	0.006903248	-0.220273166
SLC25A39	-0.572583971	8.365064061	-3.773058129	0.00045368	0.006937851	-0.229501565
RP4-781L3.1	-0.590686085	7.149155177	-3.768848274	0.000459575	0.007003267	-0.241467059
FOSL2	-0.704668543	7.621357571	-3.76362992	0.000466985	0.007078971	-0.256289391
HSPA6	1.35873789	8.058095139	3.761506537	0.000470032	0.007089883	-0.262317657
LSS	-0.55118806	7.268573402	-3.760603486	0.000471334	0.007092837	-0.264880878
CCZ1B	0.515520099	5.832569707	3.756364772	0.000477492	0.007149727	-0.276907785
AKT1	-0.542740404	8.728308613	-3.752836944	0.000482676	0.007193595	-0.286912261
LGALSL	0.548693809	6.715204177	3.739978109	0.000502033	0.007376288	-0.323336892
RACGAP1	0.563998001	7.885576731	3.739475609	0.000502805	0.007378996	-0.324758977
MMP12	1.920383107	9.038305103	3.734600746	0.000510348	0.007456218	-0.33854976
ANKRD22	-1.136626191	6.249127763	-3.730430083	0.000516888	0.007516917	-0.35034092
MX1	-0.782050416	10.29859372	-3.723992642	0.000527141	0.007611195	-0.368527084
RP1-30M3.5	0.653322642	5.744243563	3.720285338	0.000533134	0.007665654	-0.378992959
FAM168A	-0.566076031	7.057006066	-3.719356458	0.000534645	0.007667665	-0.381614366
TMA16	0.543089227	4.592041341	3.707251343	0.000554728	0.007876772	-0.415744882
CES1P1	-0.902082124	5.119325558	-3.701539059	0.000564455	0.00796786	-0.431830321
SPNS1	0.5013064	9.44795899	3.694132335	0.000577311	0.008086083	-0.452667627
AQP3	-0.953490865	8.075602589	-3.682124167	0.000598754	0.008324003	-0.486403005
RARRES3	-1.009475932	6.898302352	-3.675294886	0.000611288	0.008447238	-0.50556284
MME	-0.747426246	9.3367762	-3.671012085	0.000619276	0.008519572	-0.517568713
TVP23B	0.577508452	8.897736294	3.667385561	0.000626119	0.008580999	-0.527728998
CCL23	-1.395997681	9.457474573	-3.663403761	0.000633716	0.008657714	-0.538878439
PIK3R1	0.520231205	7.533139712	3.661640707	0.000637107	0.008687609	-0.54381309
CKS2	0.772967758	8.519737583	3.661004527	0.000638336	0.008698879	-0.545593396
ISG15	-0.667915176	9.471540452	-3.641200525	0.000677725	0.0090926	-0.600930066
LINC01093	-0.793972747	4.717974409	-3.640919169	0.000678301	0.009093608	-0.601715065
TNFAIP6	-1.990720842	10.56722794	-3.639604458	0.000680999	0.009102687	-0.605382757
BEX5	-0.720862474	4.894250041	-3.621123749	0.000720032	0.0094609	-0.656862788
ZNF468	0.54314679	8.349453824	3.59367696	0.000781983	0.010013634	-0.733054295
FAM213B	0.803703413	8.117439529	3.587255013	0.000797198	0.010148462	-0.750835407
SOCS2	-0.555698279	4.882269423	-3.577355003	0.000821211	0.010362769	-0.778212155
SPP1	1.246409026	7.998578903	3.571114084	0.000836703	0.010478875	-0.79544878
ENTHD1	0.658159106	4.167832347	3.570154855	0.000839109	0.010497268	-0.798096566
CTSK	1.004281816	8.925281413	3.564541899	0.00085332	0.010619419	-0.813582239
FNIP2	0.773908261	9.731234856	3.559292113	0.000866819	0.010750348	-0.828053679
SSBP3	0.753746951	6.169844515	3.557628608	0.000871139	0.010797741	-0.832636776
EPS8	1.388362904	7.675219768	3.556260086	0.000874709	0.010835782	-0.836406274
TMEM117	0.508456018	6.166893314	3.555096428	0.000877755	0.01086109	-0.839610852
RP11-548H18.2	-0.607347796	8.721317028	-3.551600533	0.000886967	0.010950052	-0.849234609
CCL4	-1.600002335	11.37113266	-3.548099758	0.000896285	0.011021103	-0.858866495
SAMD13	0.593994517	5.811639562	3.541051121	0.000915331	0.011179121	-0.878243673
CYP3A7-CYP3AP1	-0.690764702	4.24710368	-3.531042121	0.000943042	0.011408179	-0.905721887
GPR171	-0.509984761	3.943434198	-3.530481523	0.000944618	0.011420859	-0.907259631
HIATL2	-0.552858174	8.10271717	-3.517400938	0.000982104	0.011677971	-0.943101087
GZMA	-0.769833521	4.801490161	-3.51731398	0.000982358	0.011677971	-0.943339105
LOC340184	0.543811353	5.621162034	3.504767268	0.001019655	0.011979977	-0.977646437
GPD2	-0.586364233	8.420798191	-3.504592315	0.001020185	0.011979977	-0.978124329
ISG20	-0.918682788	5.753512759	-3.502614445	0.001026189	0.012003212	-0.983526046
GALM	0.879656091	7.871273638	3.49515039	0.001049155	0.012143425	-1.003895323
MYC	0.8644706	7.668762043	3.494029318	0.001052646	0.012169783	-1.006952569
EHD1	-0.818960401	7.909970749	-3.481185899	0.001093446	0.012468389	-1.041937518
NCAPH	0.628341009	5.32219604	3.479613168	0.001098544	0.012500842	-1.046216503
FAM26F	-0.692591139	6.035893635	-3.455867077	0.001178337	0.013159207	-1.110688111
CXCL10	-1.821727889	7.028615876	-3.444828084	0.001217285	0.013448512	-1.140572571
TCHH	-0.880467455	6.972956103	-3.421532279	0.001303542	0.014106401	-1.203455798
SLC19A2	0.512490514	8.257044943	3.418363119	0.001315717	0.014197362	-1.211991181
S100P	-1.112001921	7.787293916	-3.409955413	0.001348544	0.014470453	-1.234612878
PSTPIP2	-1.063312893	9.436308223	-3.40738505	0.001358734	0.014543764	-1.24152215
NFKB1	-0.580358943	10.23980493	-3.404410807	0.001370617	0.014621761	-1.249513251
MAPKAPK2	-0.512517225	7.907698744	-3.404386017	0.001370717	0.014621761	-1.249579839
RP11-182L21.5	0.50701703	6.352678472	3.386209699	0.001445519	0.015187415	-1.298325767
TBC1D4	-0.51532003	8.890732266	-3.380411564	0.001470186	0.015357168	-1.313842963
HP	-1.416441378	7.388048443	-3.379735948	0.001473086	0.015372631	-1.315650047
C3	-0.625929312	9.932508814	-3.369498216	0.001517705	0.015664625	-1.343006879
SPAG1	-0.517058507	5.036428075	-3.365600943	0.001535026	0.015775722	-1.353408037
ZC3H12D	0.526432303	5.33952841	3.36447556	0.001540062	0.015819973	-1.356410156
PCOLCE2	-0.537549666	11.2901218	-3.36167009	0.001552686	0.015882466	-1.363891543
METTL9	0.623234929	6.841341003	3.353314329	0.001590869	0.016089995	-1.386151896
CTNNAL1	0.955775981	6.815542157	3.350737415	0.001602824	0.016150556	-1.393010298
BST1	-0.500798486	7.972252288	-3.341804791	0.001644927	0.016467523	-1.41675983
LINC00622	0.525012708	3.901975866	3.3264985	0.001719525	0.016965438	-1.457366671
PKN1	-0.503264428	7.782581034	-3.325488131	0.00172456	0.016971878	-1.460043176
RELB	-0.780985086	7.474911008	-3.324990448	0.001727046	0.016971878	-1.461361377
TNIK	-0.705583354	8.175755196	-3.324911214	0.001727442	0.016971878	-1.461571233
SIGLEC15	0.55342153	6.735526554	3.321272812	0.00174572	0.01708898	-1.471204423
SLC29A3	0.561541209	10.38517117	3.312470967	0.0017907	0.017427332	-1.494482184
BTN3A3	-0.634924714	7.467596718	-3.303587044	0.001837212	0.017651678	-1.517939027
CCL20	-1.957461749	10.38475186	-3.2955862	0.00188008	0.017863649	-1.539031435
ICOS	-0.721510056	6.388090689	-3.294477381	0.001886095	0.017886098	-1.541952127
IGFLR1	-0.617718923	8.290281488	-3.280779433	0.001961926	0.018383186	-1.577983784
OTUD6B	0.56049759	7.262798319	3.276955011	0.001983608	0.018522667	-1.588027303
NR1D2	0.625786358	7.694682612	3.268068719	0.002034867	0.018838398	-1.611336312
MMP14	-0.528576374	7.658610715	-3.266518282	0.002043938	0.018882013	-1.615399171
LOC101930415	0.802722703	7.558517625	3.261763195	0.002071998	0.019027583	-1.627852291
ATP6AP1L	-0.517781278	6.084733213	-3.254126491	0.002117826	0.019333645	-1.647828692
SNAI2	-0.771709637	4.275131528	-3.249270433	0.002147465	0.019530114	-1.660516329
AXL	-0.542485619	8.364106651	-3.249083432	0.002148614	0.019532362	-1.661004682
SNX7	-0.706720283	8.713272209	-3.239558439	0.002207923	0.019886759	-1.685856108
CD163	0.526692833	9.664582328	3.233266125	0.002247949	0.020123275	-1.702248408
NNT-AS1	0.596965158	7.079510914	3.231418617	0.00225983	0.020172691	-1.707057647
TMEM123	0.50817887	10.84436825	3.224428977	0.002305322	0.020408961	-1.725236869
STAT1	-0.649965336	9.610486148	-3.222825357	0.00231588	0.020451907	-1.729404237
SCD	-0.731609151	9.768129055	-3.210042793	0.002401692	0.020919645	-1.762576317
PLTP	-1.01440493	8.332810752	-3.206461413	0.002426268	0.021074369	-1.771855581
OMA1	0.566452868	7.991246837	3.204193141	0.002441956	0.021159706	-1.777729258
CCL2	1.427300912	10.40729264	3.201215683	0.002462694	0.021287878	-1.785435413
DDIT4	-0.997942092	7.44211407	-3.195992498	0.002499476	0.021443601	-1.798943013
LRRC75A	-0.562075857	6.317458228	-3.180649582	0.002610544	0.022093317	-1.83854078
TDRD3	1.137957378	7.467958188	3.177866891	0.002631181	0.022204048	-1.84570961
LOC100127972	0.519936515	5.092682442	3.176749892	0.002639508	0.022248306	-1.84858613
L1TD1	-0.664893153	6.29128243	-3.175676098	0.002647536	0.022289947	-1.851350786
STIL	0.500771597	5.562110047	3.156732059	0.002793015	0.023031209	-1.900027816
ARNTL2	-0.577466999	6.941096892	-3.155475973	0.002802923	0.023095319	-1.90324881
CD274	-0.674369049	9.775068045	-3.153853072	0.002815773	0.023161248	-1.907409225
LOC284837	0.594393688	7.79209357	3.152774491	0.002824344	0.023192396	-1.910173485
CD84	0.653195942	7.62306273	3.149913372	0.002847199	0.023343205	-1.917503232
NDP	-1.680058683	5.051447979	-3.145435615	0.002883318	0.023520644	-1.928966047
SLC39A8	-0.671672783	7.309959095	-3.10283176	0.003249236	0.025489599	-2.037506093
LILRB5	0.614639769	5.662255116	3.098214748	0.003291414	0.025670894	-2.049211358
TIMP3	0.879624135	5.974692589	3.098135444	0.003292143	0.025670894	-2.049412314
CD48	0.604622559	7.794053842	3.094312148	0.003327467	0.025884285	-2.059096612
MELK	0.631697018	6.10134006	3.094138855	0.003329076	0.025884316	-2.059535374
CD82	-0.538597898	9.523137942	-3.090873148	0.003359544	0.025967455	-2.067800878
BNIP3	-0.778741536	6.250658562	-3.089776706	0.003369832	0.026007231	-2.070574703
IFI44L	-1.237909301	6.728909526	-3.089428405	0.003373106	0.026007231	-2.071455716
SERPINE2	-0.724699854	4.477271897	-3.089077415	0.003376409	0.026018775	-2.072343465
RHOU	-0.5709811	8.585802191	-3.087692476	0.00338947	0.0260588	-2.075845713
ASRGL1	0.621424943	7.873501096	3.085736579	0.003407997	0.026158561	-2.080790071
NDRG1	-0.564759138	9.178260956	-3.084339343	0.00342129	0.026205539	-2.084320929
ZBTB41	0.504676127	7.174665032	3.0826661	0.003437273	0.02624496	-2.088547899
TCTEX1D2	0.702823772	5.685096709	3.082311979	0.003440664	0.026261596	-2.089442293
IGFBP2	-1.24695534	7.036042534	-3.075670897	0.003504855	0.026591687	-2.106203114
HLA-DPB1	-0.543846885	10.30770773	-3.04700232	0.003795078	0.028085653	-2.1782859
PRKACB	0.675924478	8.854460167	3.043717395	0.003829736	0.028235988	-2.186517077
RHOH	-0.539035947	5.788566713	-3.033513578	0.003939294	0.028818061	-2.21204794
NLRC5	-0.55778507	7.235596672	-3.031930148	0.003956556	0.028857316	-2.216004759
PPAP2B	0.59478446	10.35447032	3.018231418	0.004108884	0.029588882	-2.250179384
ZFAND2A	0.776009061	9.118212517	3.014447698	0.004151916	0.029740522	-2.259600684
CXCL5	-1.060286023	9.84580916	-3.012146525	0.004178294	0.029844112	-2.265326675
CD180	0.771475501	5.912451333	3.001214366	0.004305762	0.030449698	-2.292489389
CA2	0.564416173	11.75481743	3.001015336	0.004308116	0.030456399	-2.292983304
QPCT	0.710593577	8.872771181	2.977950049	0.004589229	0.031658226	-2.350074064
ARMCX2	-0.548211326	7.836789449	-2.967930354	0.004716612	0.032245669	-2.374782716
GRINA	-0.621137445	10.32042557	-2.953920425	0.004900268	0.033097893	-2.409237418
IL4I1	-0.685712845	7.351054149	-2.953834126	0.00490142	0.033097893	-2.409449313
HNRNPU-AS1	0.571443801	6.380476534	2.941600647	0.005067264	0.033834883	-2.439444611
INHBA	-1.301867176	7.867742983	-2.941025535	0.005075188	0.033877347	-2.440852657
C1QC	-0.631568258	11.92574496	-2.93686256	0.005132891	0.034104825	-2.45103931
GPR84	-0.804686868	7.714281991	-2.918409472	0.005396116	0.035306272	-2.496075395
APP	0.551079979	7.781891362	2.905220311	0.005591903	0.036048549	-2.528145974
SHPRH	0.584372283	6.605816791	2.903630335	0.005615948	0.036131938	-2.532005435
CFP	-0.597542416	7.856733877	-2.898408553	0.005695593	0.036499665	-2.544670468
PTX3	1.372151206	6.52397725	2.889336856	0.005836463	0.037032148	-2.566636029
AGPAT9	1.122857099	8.753140916	2.884611877	0.005911113	0.037351492	-2.578058036
TREM2	0.868573611	10.30026025	2.874118854	0.006080079	0.037996548	-2.603377523
LOC645984	0.54378161	5.774246087	2.873376527	0.006092201	0.038061317	-2.605166339
LOC101928770	0.657771812	5.943030208	2.870321206	0.006142331	0.038302453	-2.612525514
SLC28A3	0.958948812	6.061168011	2.869685702	0.006152805	0.038351425	-2.614055537
TMEM194A	-0.560690374	7.643194001	-2.869564603	0.006154803	0.038352392	-2.614347064
FCGR2B	0.727704708	5.406930492	2.864608764	0.006237086	0.03874293	-2.626270242
SLC18B1	1.05239242	6.279021748	2.852569001	0.00644126	0.039632327	-2.655177128
GK3P	-0.526914055	8.660128044	-2.852452771	0.006443261	0.039632327	-2.655455779
MS4A6E	0.680467102	4.868318748	2.847921371	0.006521723	0.039938176	-2.666313289
AOAH	-0.600868529	7.771551893	-2.847459182	0.006529776	0.039953592	-2.667420049
PRSS21	0.883188575	7.592918214	2.846099092	0.006553526	0.0400374	-2.6706762
MT1F	-0.755705199	12.03340572	-2.841629583	0.006632138	0.04034054	-2.681368916
RP5-1074L1.4	0.561978835	5.240007146	2.836455712	0.006724232	0.040751895	-2.693732127
IRF1	-0.509653986	8.85282878	-2.832612452	0.006793408	0.040976171	-2.702905624
RND3	-0.639358937	10.04688845	-2.822470504	0.006979137	0.04169256	-2.727071836
LGMN	0.829758518	10.52513011	2.809849554	0.007216836	0.042637452	-2.757060345
OR2A4	-0.547790901	5.071582833	-2.807011427	0.007271311	0.042891028	-2.763791019
PALLD	0.517469024	6.534599249	2.803399159	0.007341196	0.043150449	-2.772350679
ATP2B1	-0.530160542	9.149857564	-2.799559497	0.007416162	0.043426058	-2.781440685
ID3	-0.779632001	6.5515951	-2.799383982	0.007419605	0.043426871	-2.781855991
LOC731424	-1.344561956	8.575932937	-2.790982274	0.00758619	0.043991737	-2.801714723
SELM	-0.721758896	6.878148361	-2.787999895	0.007646151	0.044234507	-2.808753923
SLC12A8	0.986352229	6.330357452	2.778776443	0.007834375	0.044832334	-2.83049009
RNF19B	-0.661376061	9.022047093	-2.772414768	0.007966685	0.045416996	-2.845452467
LOC102724356	0.617472183	6.782737916	2.768749381	0.008043852	0.045704952	-2.854062271
SIGLEC1	-0.771220876	8.457852823	-2.741456063	0.008640538	0.047815538	-2.917918274
LOC340340	-0.608534444	6.243935931	-2.740134241	0.008670447	0.047907593	-2.920999395
CP	-0.514516969	4.525166595	-2.734795302	0.008792227	0.048462485	-2.933433477
HPGD	0.692838025	8.900166735	2.733550409	0.008820849	0.048540446	-2.936330269
CA12	-0.607722991	5.987792138	-2.730327944	0.008895337	0.048851032	-2.943824375
CXCL11	-1.207094667	4.315643229	-2.728787754	0.008931143	0.048948359	-2.947403978
SLC16A10	0.606616941	5.583773233	2.725286291	0.00901304	0.049260061	-2.955536455
IFIT2	-0.614036703	8.579245985	-2.715594	0.009243358	0.050173973	-2.97800866
GRAMD1A	-0.650845006	7.305468845	-2.70941864	0.009392919	0.050647179	-2.99229664
PTGS2	-1.466111874	6.609777913	-2.7075566	0.00943845	0.050828203	-2.996600268
ITGA4	-0.541392177	4.970470018	-2.70435329	0.009517256	0.051036813	-3.003998912
MAMLD1	-0.615301202	6.352707893	-2.697812897	0.00968004	0.051693024	-3.019085571
RHBDD2	-0.519568819	8.841016556	-2.696832617	0.009704658	0.051785282	-3.021344505
SLC25A43	0.506433237	8.886629628	2.696333005	0.009717227	0.0518216	-3.022495569
EIF3C	0.53223849	5.056492945	2.682210947	0.010078757	0.053088618	-3.054967872
VAMP5	-0.528006807	5.902313282	-2.682207554	0.010078845	0.053088618	-3.054975658
CHIT1	1.729672157	7.964984483	2.669598557	0.010412047	0.054354498	-3.083864386
ENG	-0.511978695	8.645506085	-2.666527437	0.010494721	0.054628049	-3.09088572
CRYAB	0.507351757	5.378099605	2.664866678	0.010539679	0.054783056	-3.094680176
MMP9	0.841601702	10.97075321	2.654003594	0.01083814	0.055643347	-3.119457391
GPR64	-1.037722643	6.13542835	-2.649700063	0.010958508	0.056097058	-3.129252752
MT1M	-1.252235254	9.569835247	-2.648059607	0.011004713	0.056228421	-3.132983576
RP11-389C8.2	0.765703466	7.062160879	2.647852342	0.011010563	0.056235637	-3.133454831
MARCKS	-0.859767167	8.658507331	-2.644002943	0.01111974	0.056562568	-3.142202235
IL36G	-0.539443893	4.491307755	-2.643332374	0.01113886	0.056633218	-3.143725091
TLR5	0.531169071	6.66524315	2.640719998	0.011213635	0.056919841	-3.149655074
SEPP1	0.588927025	4.230811027	2.634229122	0.01140142	0.057564153	-3.16437051
HEY1	-1.00503213	7.066723611	-2.632127558	0.011462835	0.0577664	-3.169129271
TNFRSF21	0.533828959	8.211812283	2.629921172	0.011527638	0.057983618	-3.174122391
SULT1C2	0.713160538	5.474043503	2.620746889	0.01180071	0.058905818	-3.194851117
GINS1	0.54478495	5.208660078	2.615231613	0.011967708	0.059451424	-3.207286911
VMP1	0.513015503	8.848102931	2.575504643	0.013235938	0.06335111	-3.296290787
LINC01003	0.661914688	6.909094036	2.573412076	0.013306025	0.063557321	-3.300950947
TFPI2	-1.369871176	4.945207575	-2.55985641	0.013768306	0.065010661	-3.331071185
SERPINE1	-0.594831401	6.583462145	-2.556879052	0.013871782	0.065345042	-3.337670891
RRN3P2	0.538538132	6.368815602	2.537144854	0.014575737	0.067368837	-3.381269125
GADD45A	0.71075944	8.658864152	2.536891998	0.014584964	0.067397099	-3.381826112
GBP1	-0.750577652	9.39267208	-2.533308659	0.014716298	0.067700599	-3.389714945
C3AR1	-0.535242217	11.42710657	-2.520187645	0.015206434	0.069083576	-3.418529762
PLS3	-0.799514117	4.827900461	-2.519795188	0.015221321	0.069106484	-3.419389895
LOC100132891	0.759460901	6.786349268	2.511779918	0.015528257	0.070080812	-3.436934593
RABGEF1	0.598118913	8.337871893	2.509674641	0.015609804	0.070240094	-3.441535864
DDX43	-0.568793597	4.982036136	-2.505128908	0.015787208	0.070763029	-3.451461037
FOS	-0.572058291	8.826981213	-2.504538492	0.015810383	0.070852243	-3.452749157
TMCC3	0.633252315	7.394536292	2.503437865	0.015853669	0.070956272	-3.455149798
HAMP	1.132924757	6.284933708	2.502296874	0.015898655	0.071100677	-3.457637638
RASGRP1	-0.868228541	6.868123167	-2.495798953	0.016157068	0.071929512	-3.471789489
PNPLA3	0.634456302	6.834458647	2.495189625	0.016181494	0.072004662	-3.473115119
MYO1G	-0.563604363	8.269582486	-2.482102677	0.016714268	0.073324708	-3.501527332
VCAN	-0.85209627	5.888137005	-2.479604781	0.016817747	0.073689092	-3.506937463
SHCBP1	0.546158468	4.494013348	2.468394976	0.017289313	0.075040512	-3.531165481
LIF	-0.536738895	5.643284457	-2.456479278	0.01780367	0.076688621	-3.556827422
ABCG1	-0.500957438	9.031295349	-2.456455615	0.017804705	0.076688621	-3.556878288
RRM2	0.964710148	5.244763586	2.44720348	0.018213609	0.077913371	-3.576738339
MAP3K7CL	-0.641014468	5.4559356	-2.445922495	0.018270887	0.078050753	-3.579483502
SLC2A6	-0.813631149	9.399497084	-2.443397262	0.018384277	0.078411095	-3.584891877
HS3ST3B1	-0.598243674	5.618489179	-2.442843673	0.018409219	0.07847111	-3.586076946
IDO1	-1.057799824	7.309083126	-2.432189703	0.018895239	0.079929185	-3.608843783
HPSE	-0.782997434	5.226695702	-2.430955192	0.018952298	0.080092322	-3.611476915
OASL	-0.755500132	8.740493836	-2.422751737	0.019335428	0.081062801	-3.628948248
TLR2	-0.57343472	10.41343634	-2.415042729	0.019701819	0.082059312	-3.645325095
HTATSF1P2	0.700011624	4.445302902	2.379162378	0.021490784	0.086788781	-3.721017401
LOC101928894	0.598491085	5.30915658	2.37870264	0.021514625	0.086826419	-3.721981552
FAM3B	-0.725963267	7.975535404	-2.378617241	0.021519056	0.086826419	-3.722160633
IL7R	-0.861822033	10.5558911	-2.371072862	0.021913765	0.087825405	-3.737961398
HTRA1	0.66144697	5.97256562	2.364428776	0.022266743	0.088747296	-3.751844253
LOC100134445	0.574357712	8.085049069	2.354417902	0.02280823	0.090125803	-3.77270466
TNF	-0.673567876	8.168436741	-2.340475741	0.023582032	0.092240844	-3.801641709
IL1RN	-0.588533193	8.272993966	-2.324203721	0.024514816	0.09472588	-3.835243997
F3	-0.605023048	6.875927718	-2.321026072	0.024700779	0.095205664	-3.841784456
CXCL3	-0.869562373	9.517719362	-2.299727304	0.025980113	0.098783733	-3.885441044
GNG11	-0.606612663	5.100864094	-2.292250749	0.026443031	0.099999544	-3.900690545
TMEM170B	0.636348664	7.303767004	2.287366884	0.026749378	0.100858618	-3.910630667
LOC101928429	0.80964375	7.878753239	2.283728728	0.026979639	0.101497065	-3.918024484
LOC100507642	0.568949953	7.35162079	2.279730765	0.027234707	0.102130936	-3.926138773
CHI3L1	0.91302863	7.869277635	2.260786944	0.028472743	0.105446462	-3.96443367
EREG	-0.521390323	5.664548586	-2.251686207	0.029085108	0.107037547	-3.9827403
CEP55	0.55517088	4.465999071	2.249955018	0.029202911	0.107325159	-3.986216016
C11orf45	0.531353828	6.9751768	2.24340497	0.029652469	0.108535255	-3.999347247
NUCB1	-0.521610885	9.707527522	-2.220770418	0.031253624	0.112270401	-4.044487947
TPD52L1	0.60031054	6.65235388	2.201223411	0.032697504	0.115615896	-4.083175109
TRIM6	-0.500277896	6.152050274	-2.198505364	0.032902879	0.11600113	-4.088532813
GZMB	-0.853542888	5.67843892	-2.198014233	0.03294011	0.116014311	-4.089500342
MEIS3P1	-0.5339189	6.98940304	-2.186861416	0.033795652	0.118205627	-4.111424406
DGAT2	-0.612275561	6.95468419	-2.176164586	0.03463458	0.120342939	-4.132367361
SPINK1	0.993530909	7.484523566	2.169566809	0.035161137	0.121723303	-4.145243441
TRAF1	-0.684421557	5.803714886	-2.132181208	0.038280046	0.128740446	-4.217603514
PPBP	-1.146397826	7.312204463	-2.12772675	0.038667394	0.129593523	-4.226156733
S100A9	0.500965064	11.61066618	2.100159357	0.041141907	0.134860257	-4.278764095
CXCL1	-1.048723649	7.394096601	-2.098415069	0.041303037	0.135102111	-4.282073805
IL7	-0.542914909	6.001558697	-2.078903359	0.043143384	0.139187551	-4.318942034
MARCKSL1	-0.520661147	7.68219945	-2.063788847	0.044617767	0.142353487	-4.347306106
C12orf50	0.823727492	4.972510636	2.061466208	0.044848181	0.142941201	-4.351649624
RP1-93H18.6	-0.698573575	4.770884597	-2.043237954	0.046692727	0.146325041	-4.385597062
HLA-DQA1	-1.679843382	9.521493308	-2.029904767	0.04808334	0.149019128	-4.410269493
IER3	-0.858164374	10.20449811	-2.02730598	0.04835853	0.14947469	-4.415062765
CLEC4E	-0.755159372	8.450196172	-2.014131716	0.049774679	0.152365781	-4.439282947
